# Supplementary material for: Downregulation of LncRNA-XIST inhibited development of non-small cell lung cancer by activating miR-335/SOD2/ROS signal pathway mediated pyroptotic cell death
Source: publisher site journal article supplement (doi:10.18632/aging.102291), 2019-09-25
Supplement: Supplementary file [file aging-v11i18-102291-supplementary-material-SD1.pdf]

**SUPPLEMENTARY FIGURE**

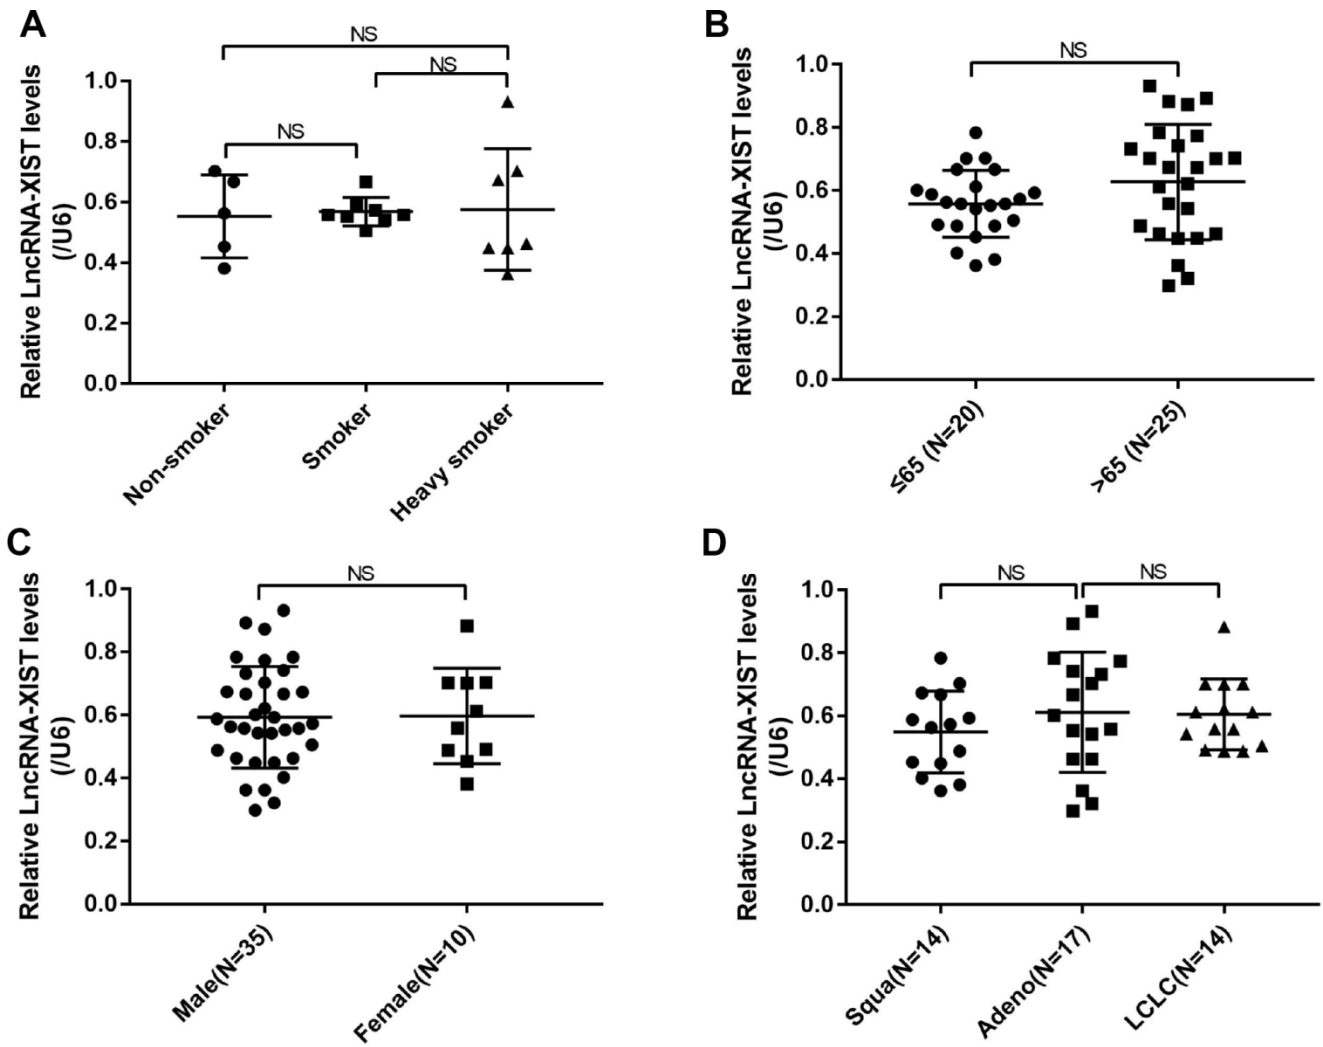

**Supplementary Figure 1.** The expression levels of LncRNA-XIST in patients with different (A) smoking status, (B) age, (C) gender and (D) pathological type. (“NS” represented no statistical significance, “\*” represented  $p < 0.05$ , “\*\*\*” represented  $p < 0.01$ ).
